# Supplementary material for: An organic–inorganic hybrid perovskite logic gate for better computing
Source: Royal Society of Chemistry journal article supplement (doi:10.1039/c5tc02270c), 2015-01-01
Supplement: c5tc02270c1.pdf [file c5tc02270c1.pdf]

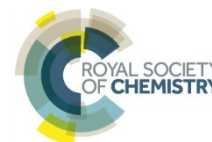

## Journal of Material Chemistry C

### ARTICLE

### Supporting Information

## Organic-Inorganic Hybrid Perovskite Logic Gate for Better Computing

Guoming Lin,<sup>a,b</sup> Yuanwei Lin,<sup>c,d</sup> Rongli Cui,<sup>a</sup> Huan Huang,<sup>a</sup> Xihong Guo,<sup>a</sup> Cheng Li,<sup>a,b</sup> Jinquan Dong,<sup>a</sup> Xuefeng Guo<sup>c,e</sup> and Baoyun Sun<sup>\*a</sup>

### Experimental

**CH<sub>3</sub>NH<sub>3</sub>PbI<sub>3</sub> film synthesis and characterization:** PbI<sub>2</sub> was purchased from Alfa Aesar without further purification. PbI<sub>2</sub> and CH<sub>3</sub>NH<sub>3</sub>I (MAI) were dissolved into dimethylformamide (DMF) and 2-propanol with concentrations of 450 mg ml<sup>-1</sup> for PbI<sub>2</sub> and 55 mg ml<sup>-1</sup> for MAI, respectively. PbI<sub>2</sub> was heated at 65 °C for about 30 min to make sure it was fully dissolved. The PbI<sub>2</sub> solution was spin-cast on the top of PEDOT:PSS covered ITO substrate at 5,000 r/min for 30 s. The MAI solution was spin-cast on the top of PbI<sub>2</sub> film at 5,000 r/min for 20 s at room temperature subsequently. The spin-cast PbI<sub>2</sub>/MAI stacking films were thermally annealed at 100 °C for 2h. The X-ray diffraction pattern was collected on a Bruker D8-Advance x-ray powder diffractometer with Cu K $\alpha$  radiation ( $\lambda$  = 1.5406 Å) and a step size of 0.02°. The scanning electron microscope image was taken on a Hitachi S4800 with an acceleration voltage of 5 kV. Tapping mode atomic force microscope image was performed on a Bruker Dimension EDGE. The electronic absorption spectroscopy was carried out in an Agilent Cary 5000 UV-Visible spectrometer.

**Device Fabrication and characterization:** After the perovskite film deposition, the device was finished by thermal evaporation of copper (100 nm) under vacuum. The device area is the overlap of the ITO substrate and copper electrode (area ~1 mm<sup>2</sup>). The electrical measurement was done using Keithley 4200 source measure unit. The scanning rate for the *I*-*V* curve was 0.5 V s<sup>-1</sup>. All samples were measured at room temperature and in air with humidity lower than 30%. San-Electric XES-70S1 solar simulator provided the light source for light illumination (100 mW cm<sup>-2</sup>), and a Si diode was used to calibrate the light intensity.

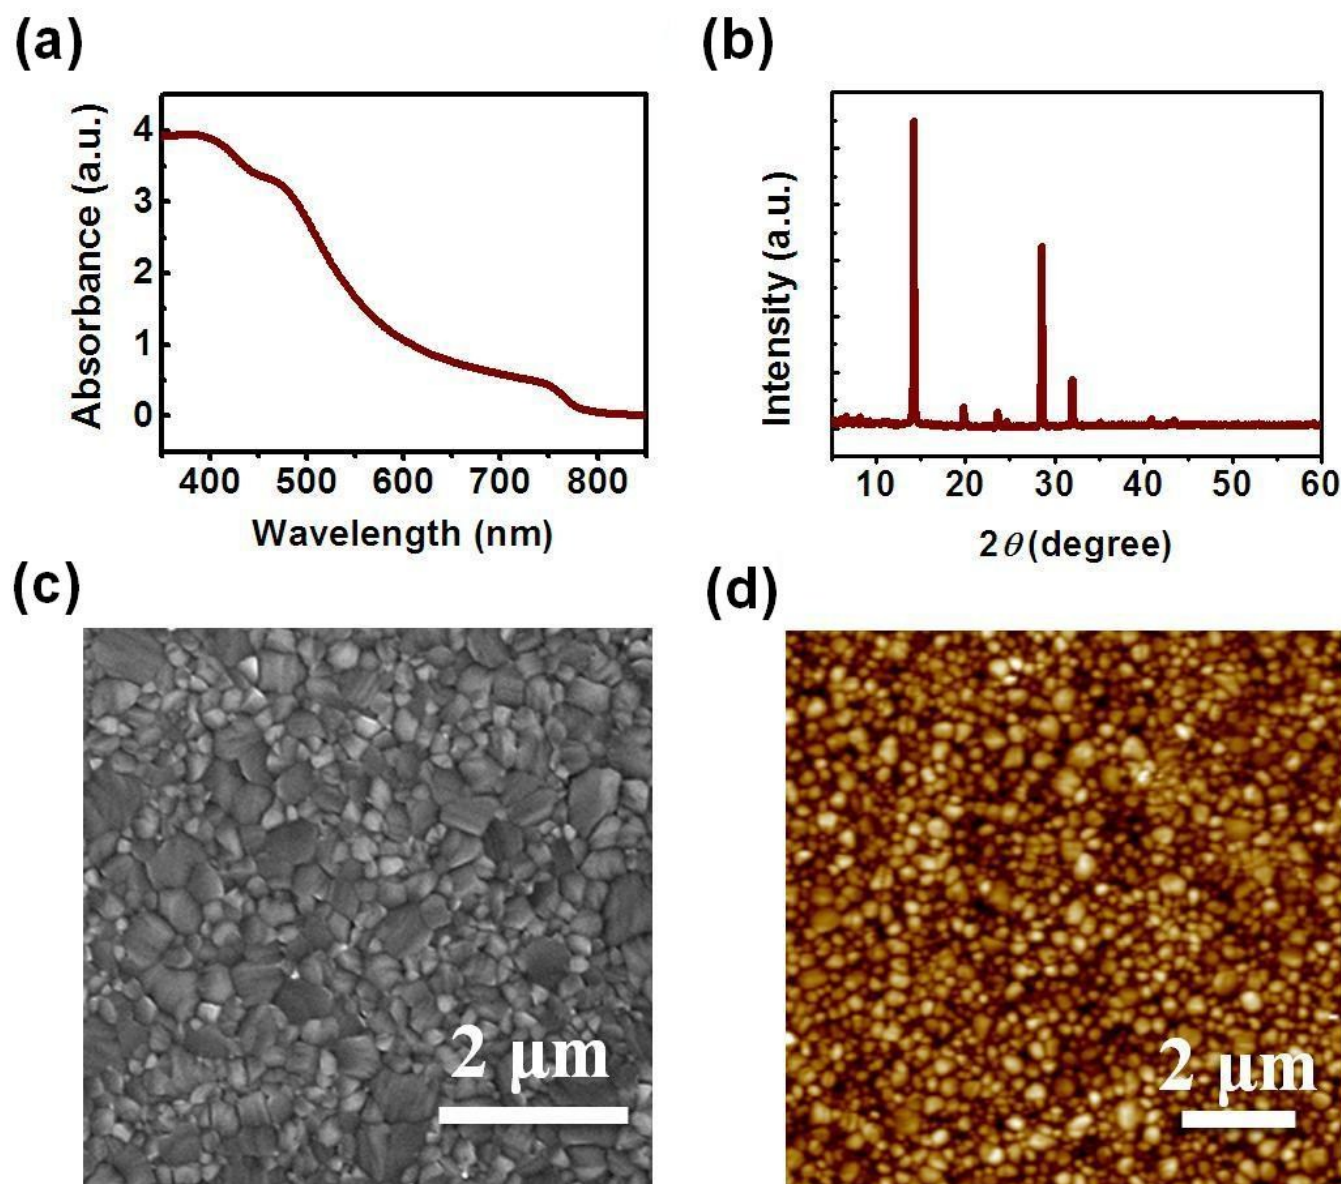

**Fig. S1** Organic-Inorganic hybrid perovskite characterization. (a) UV-Vis absorbance of  $\text{CH}_3\text{NH}_3\text{PbI}_3$  thin film on quartz. (b) X-Ray diffraction (XRD) spectrum of the perovskite material without Cu top electrode. (c) Scanning Electronic Microscope (SEM) image of the solution-processed perovskite film. (d) Atomic Force Microscope (AFM) image of the synthesized perovskite film.

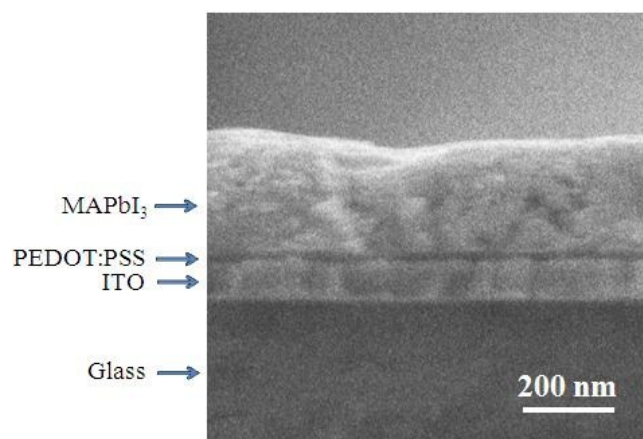

**Fig. S2** Cross-sectional SEM image of sandwiched ITO/PEDOT:PSS/CH<sub>3</sub>NH<sub>3</sub>PbI<sub>3</sub> structure without top Cu electrode.

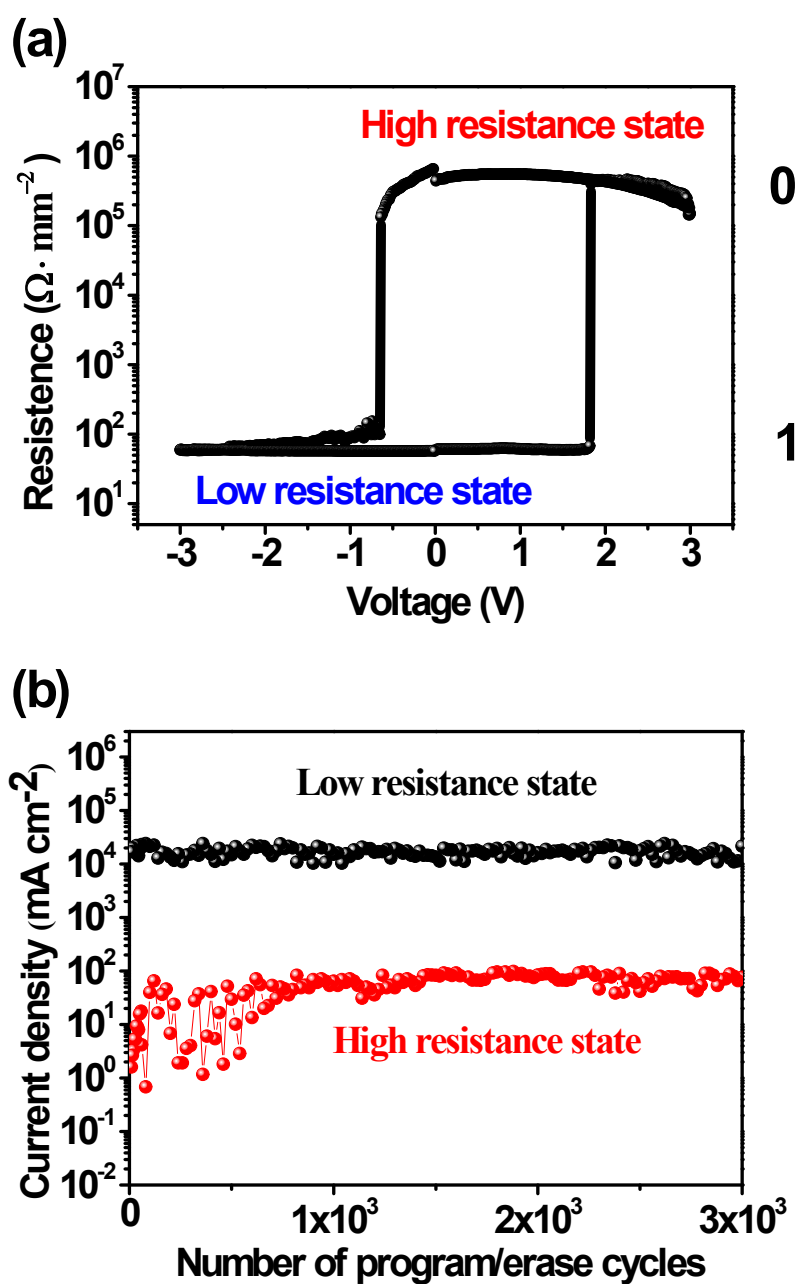

**Fig. S3** Additional characterization of the memristive device. (a) Resistance-Voltage characteristics of the memristor device: ITO/PEDOT:PSS/ $\text{CH}_3\text{NH}_3\text{PbI}_3$ /Cu. (b) Endurance performance of ITO/PEDOT:PSS/ $\text{CH}_3\text{NH}_3\text{PbI}_3$ /Cu memristor device.

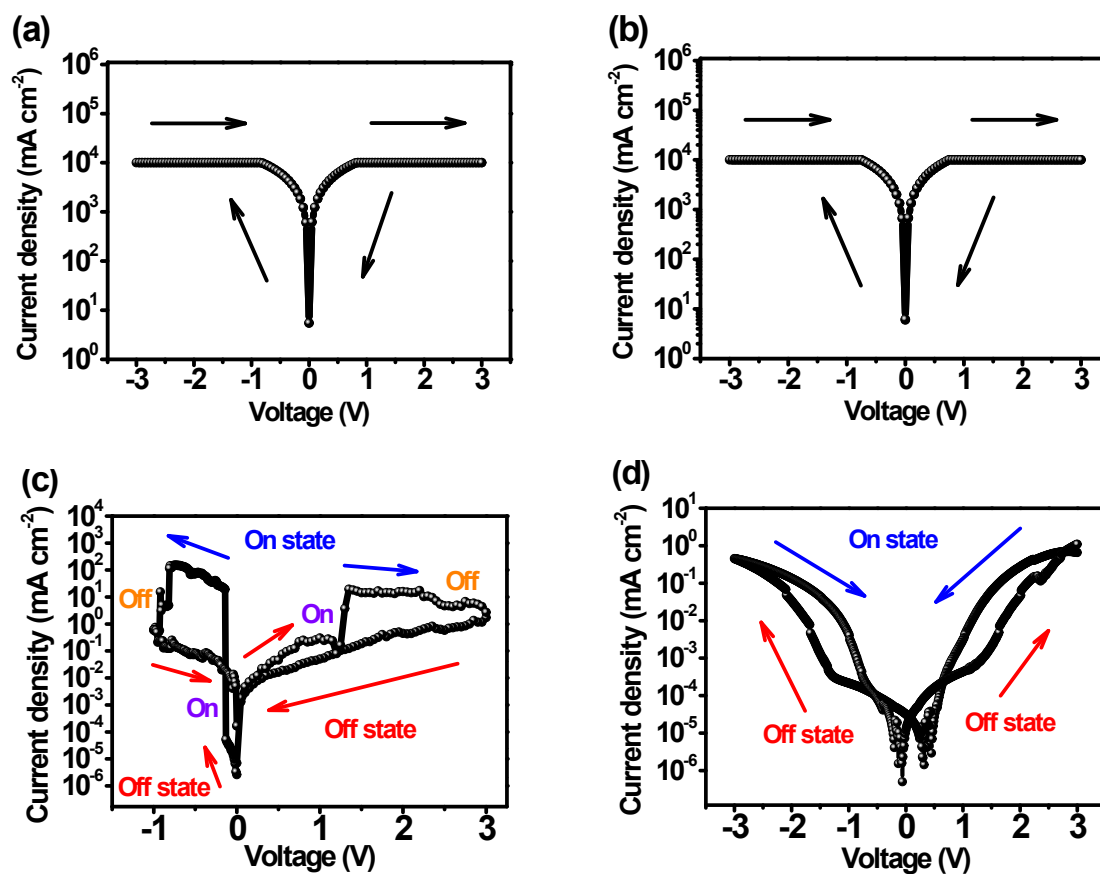

**Fig. S4** Current-Voltage ( $I$ - $V$ ) characterization of the control devices. (a) Cu/CH<sub>3</sub>NH<sub>3</sub>PbI<sub>3</sub>/Cu. (b) Cu/CH<sub>3</sub>NH<sub>3</sub>PbI<sub>3</sub>/Au. (c) ITO/PEDOT:PSS/CH<sub>3</sub>NH<sub>3</sub>PbI<sub>3</sub>/ITO. (d) ITO/PEDOT:PSS/CH<sub>3</sub>NH<sub>3</sub>PbI<sub>3</sub>/Au

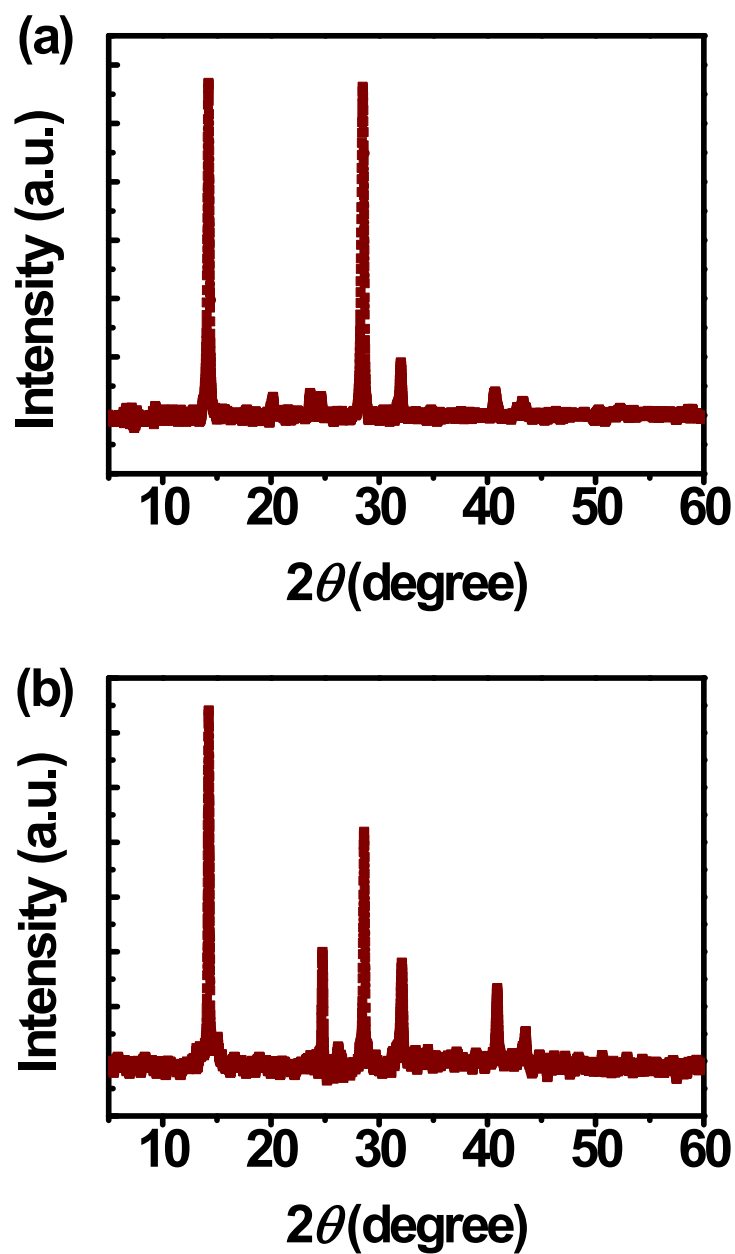

**Fig. S5** X-Ray diffraction (XRD) spectra of (a)  $\text{CH}_3\text{NH}_3\text{PbI}_{3-x}\text{Cl}_x$ ; (b)  $\text{CH}_3\text{NH}_3\text{Pb}_{0.5}\text{Sn}_{0.5}\text{I}_3$ .

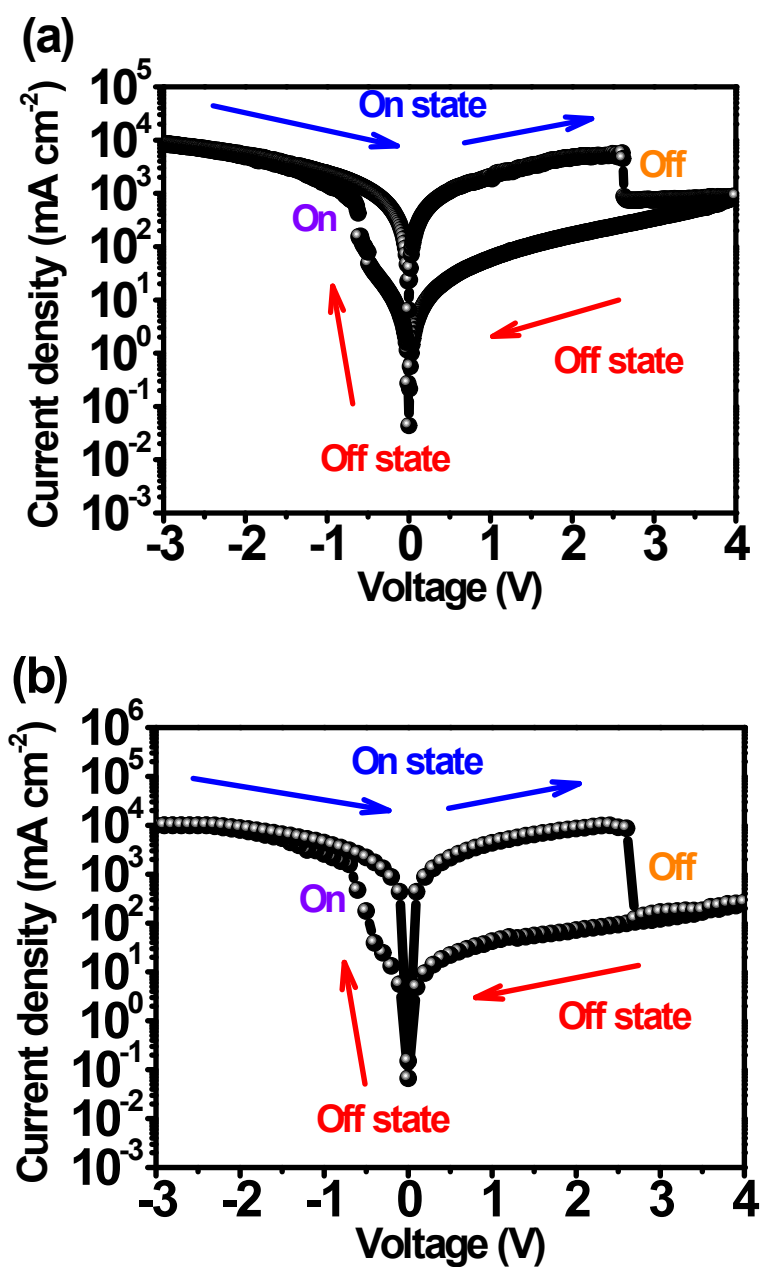

**Fig. S6** *I*-*V* characteristics of the memristor devices with sandwich structure. (a) ITO/PEDOT:PSS/CH<sub>3</sub>NH<sub>3</sub>PbI<sub>3-x</sub>Cl<sub>x</sub>/Cu. (b) ITO/PEDOT:PSS/CH<sub>3</sub>NH<sub>3</sub>Pb<sub>0.5</sub>Sn<sub>0.5</sub>I<sub>3</sub>/Cu.
